# Supplementary material for: Plasticity in zwitterionic drugs: the bending properties of Pregabalin and Gabapentin and their hydrates
Source: PubMed Central journal article supplement (PMC6608624; doi:10.1107/s2052252519004755), 2019-05-22
Supplement: m-06-00630-sup4.pdf [file m-06-00630-sup4.pdf]

# IUCrJ

**Volume 6 (2019)**

**Supporting information for article:**

**Plasticity in zwitterionic drugs: the bending properties of  
Pregabalin and Gabapentin and their hydrates**

**U. B. Rao Khandavilli, Matteo Lusi and Patrick J. Frawley**

Pregabalin (SPG) and Gabapentin (GP) were purchased from Flourochem. Methanol was purchased from the Sigma-Aldrich and Milli-Q water was used for the experiments.

**Crystallization of SPG:** SPG crystals were obtained from the commercially available SPG that was dissolved in methanol to saturation and left it at room temperature for 2 days.

**Crystallization of SPGH1:** SPG was dissolved in pure water and crystallized at 280 K for 3-5 days to get the good quality crystals.

**Crystallization of GP:** GP and its hydrate crystals are reproduced by following the same procedure mentioned in the reported publications.<sup>1,2</sup>

### S1. Experimental Details:

**Optical microscopy:** SPGH I and GP hydrate crystals were bent with tweezers and a needle, the images have captured using Olympus IX53 microscope under a 4× magnification.

**IR Spectroscopy:** IR spectra for SPG and SPGH I have been collected on a PerkinElmer Spectrum 100 FT-IR Spectrometer equipped with a PerkinElmer Universal ATR Sampling Accessory.

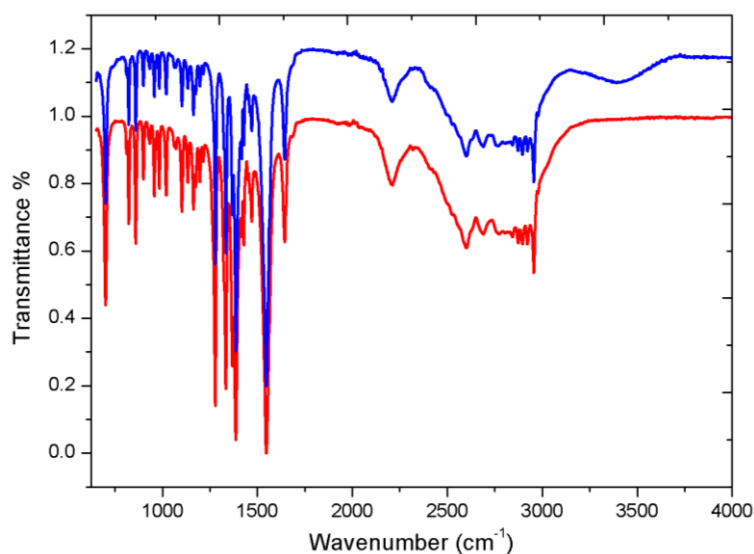

**Figure S1** IR spectra for SPG (blue) and SPGH I (red).

**Raman Spectroscopy:** Raman spectra for SPG and SPGH I have been collected on a Horiba Jobin Yvon LabRam Aramis spectrometer with a 532 nm laser source. The spectrometer was coupled with an Olympus BX40 confocal microscope with a CCD camera cooled by a thermoelectric Peltier device. Raman maps were processed using the LabSPEC 5 software package.

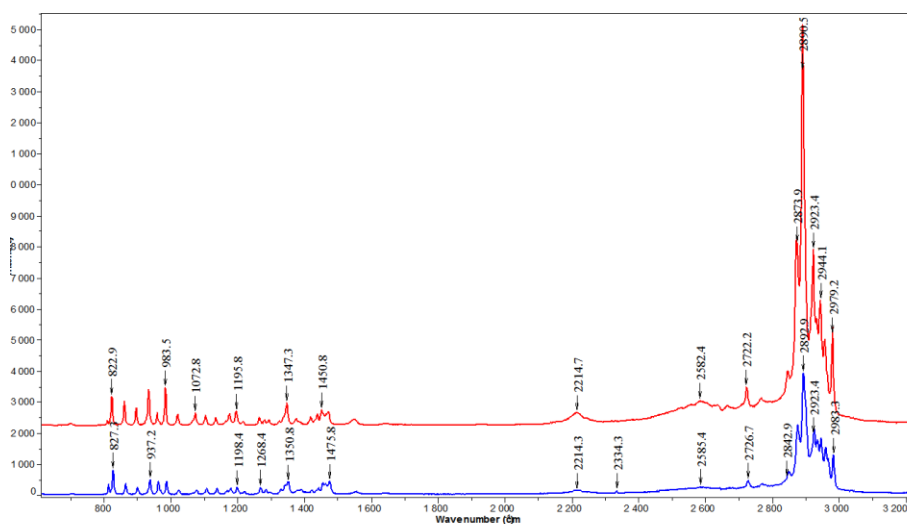

**Figure S2** Raman spectra for SPG (blue) and SPGH I (red).

**Powder X-ray diffraction (PXRD):** PXRD data were collected on Empyrean diffractometer (PANalytical, Philips) using Cu  $K\alpha_{1,2}$  radiation ( $\lambda = 0.1541$  nm) at room temperature operated at 40 kV and 40 mA. The samples were scanned over a range of  $4-40^\circ 2\theta$  using a step size of  $0.02^\circ 2\theta$  and a scan speed of  $0.02^\circ 2\theta/s$ .

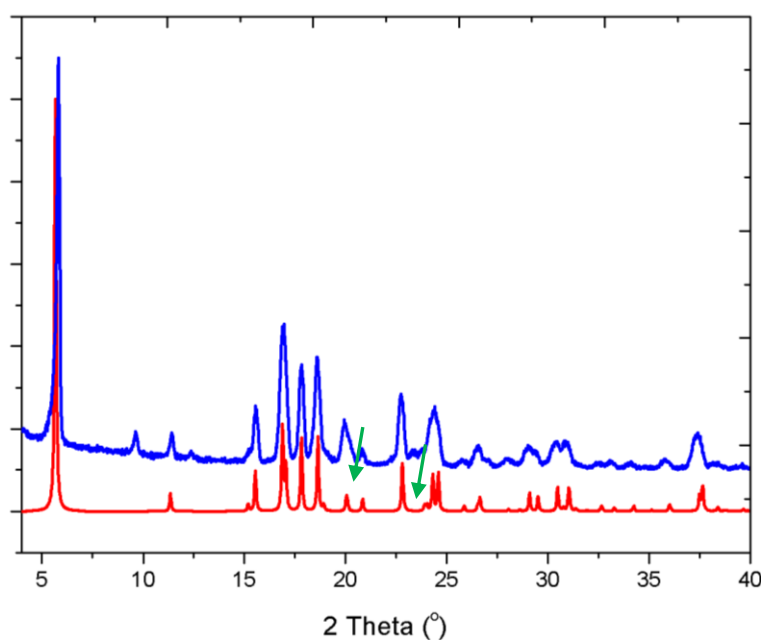

**Figure S3** PXRD data for SPGH I: experimental (blue) and theoretical (red), green arrow indicates the traces of SPG.

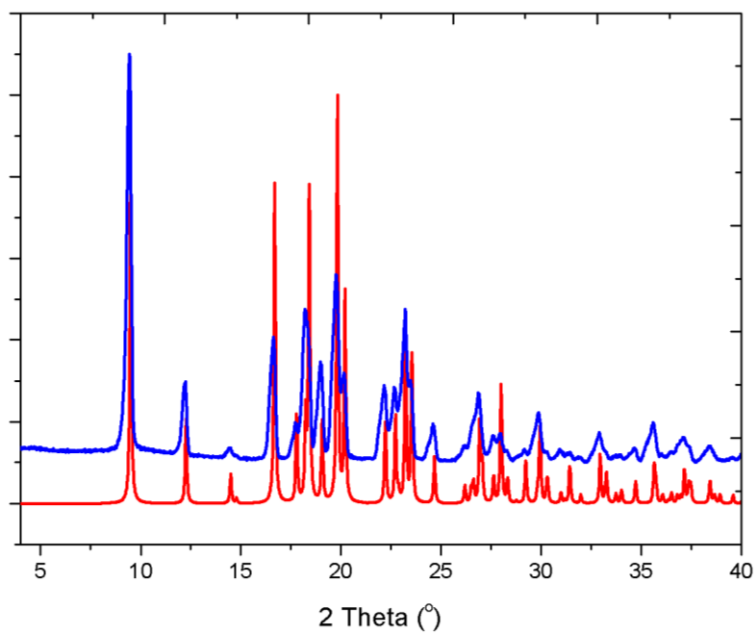

**Figure S4** PXRd data for SPG (commercial): experimental (blue) and theoretical (red).

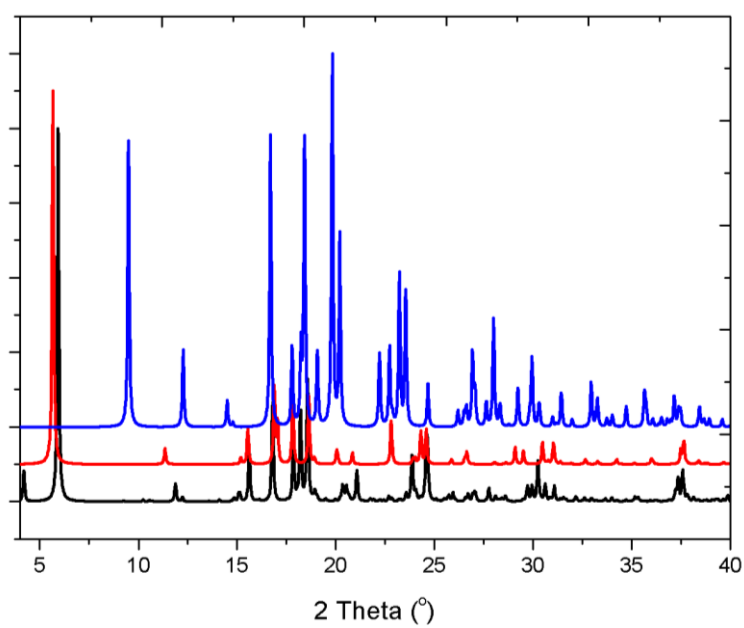

**Figure S5** Theoretical PXRd comparison for SPG (blue), SPGH I (red) and SPGH II (black).

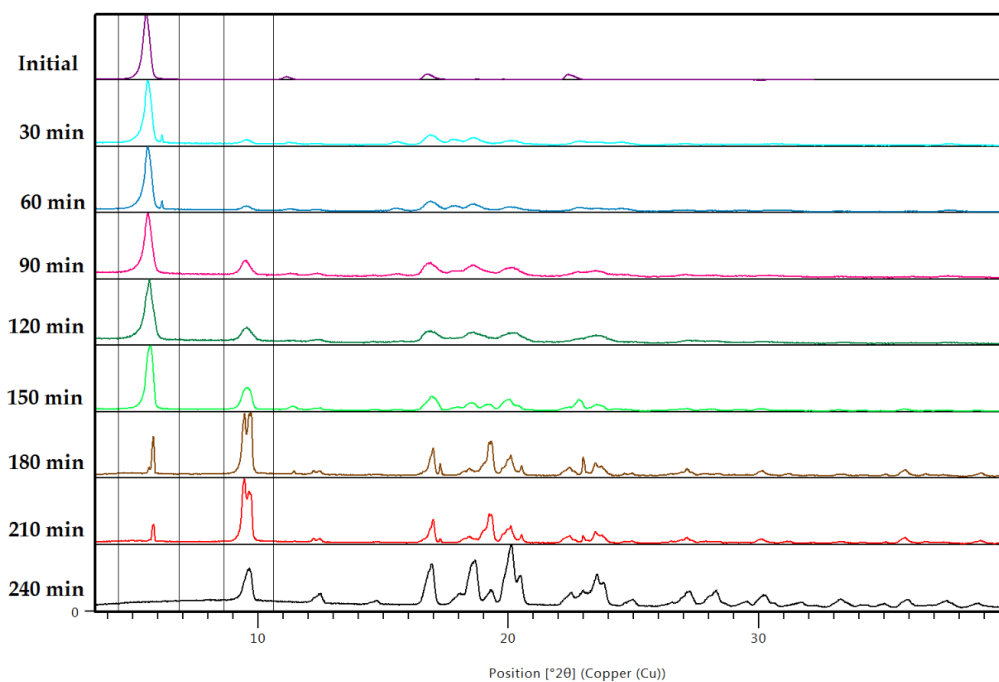

**Figure S6** Conversion of SPGH I to SPG with time at room temperature

**Differential Scanning Calorimetry:** calorimetric measurements of SPG and SPGH I were performed on a DSC 214 Polyma, NETZSCH instrument. Typically, 3-5 mg of sample was accurately weighed into a hermetically sealed aluminium pan and heated to 250 °C with 10 °C min<sup>-1</sup> heating rate, under nitrogen gas flow 50 mL min<sup>-1</sup>.

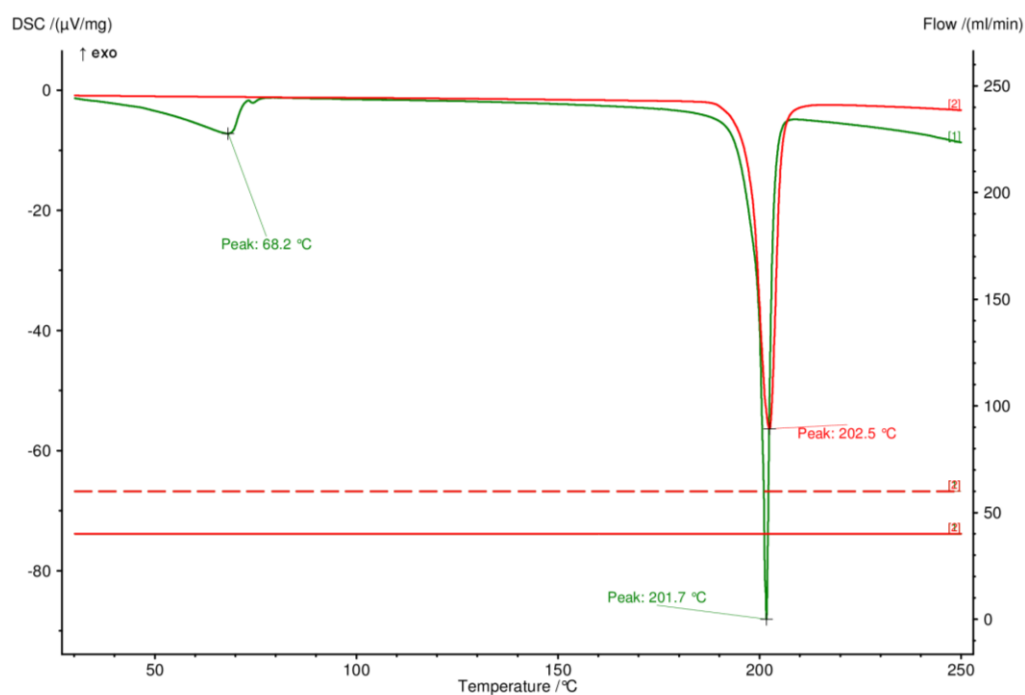

**Figure S7** DSC data for SPG (red) and SPGH I (Green)

**Thermogravimetric Analysis:** Thermograms of SPG and SPGH I were measured with a Perkin-Elmer TGA 4000 with a heating rate of  $10\text{ }^{\circ}\text{C min}^{-1}$  under a nitrogen stream of  $50\text{ mL min}^{-1}$ .

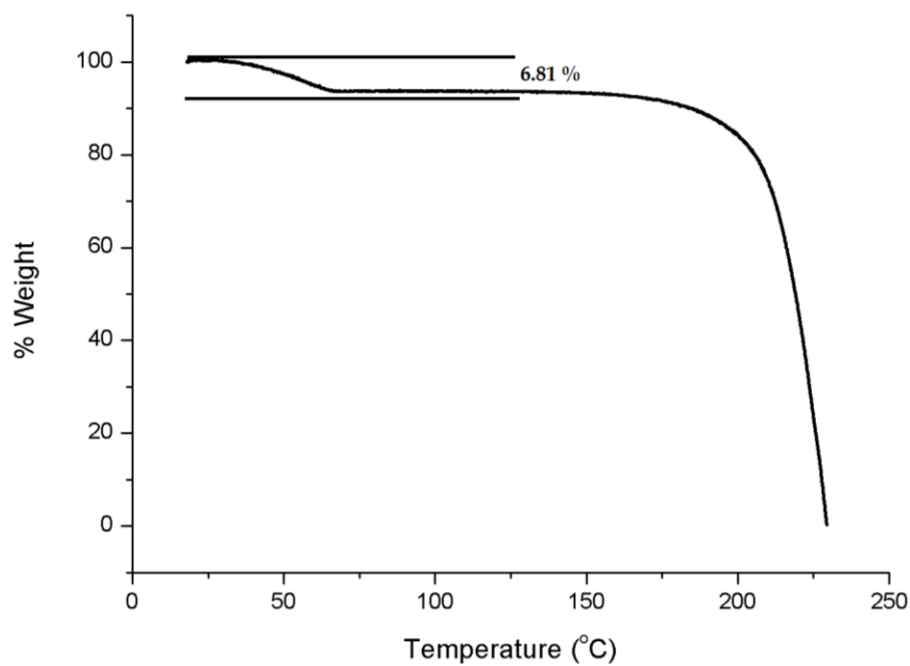

**Figure S8** TGA data for SPGH I

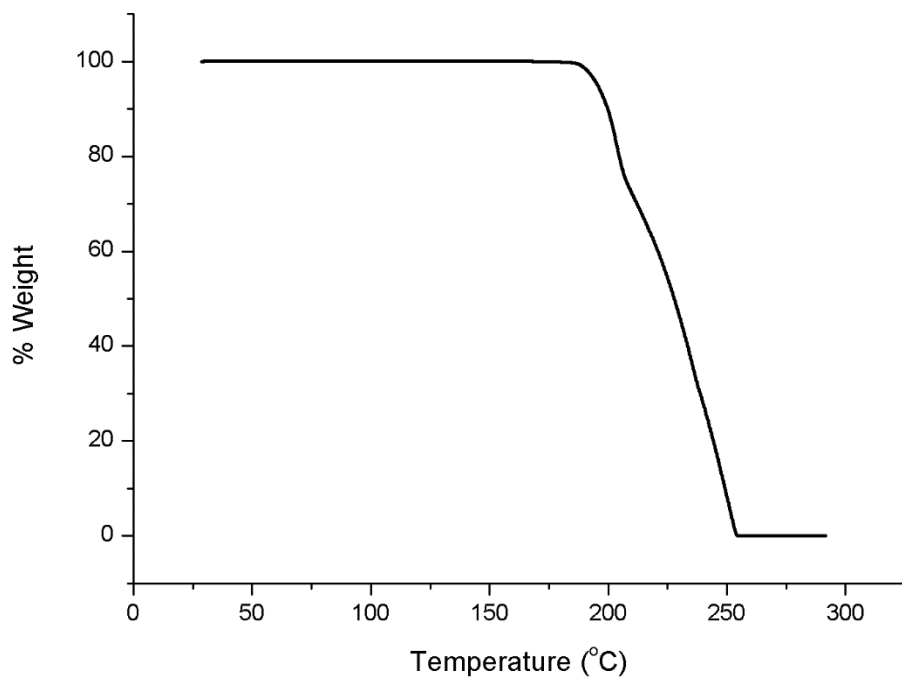

**Figure S9** TGA data for SPG

**X-ray Crystallography:** Single crystal data for SPGH I were collected at ambient temperature using a three circles Bruker D8 Quest with sealed tube Mo anode,  $K\alpha$  radiation = 0.71073 Å, and a Photon 100 detector. Single crystal data for SPGH I were collected at 150 K under a nitrogen-flow (Oxford Cryosystem) using a three circles Bruker D8 Quest with microfocus Cu anode,  $K\alpha$  radiation = 1.5418 Å, and a Photon 100 detector.

The data were integrated and corrected for absorption with the Bruker Apex Suite of programs. The structure solution was obtained by direct methods and refined against all  $F^2$  with the SHELX software interfaced through X-Seed. Non-hydrogen atoms were refined anisotropically and hydrogen atoms were placed in calculated positions refined using idealized geometries (riding model) and assigned fixed isotropic displacement parameters.

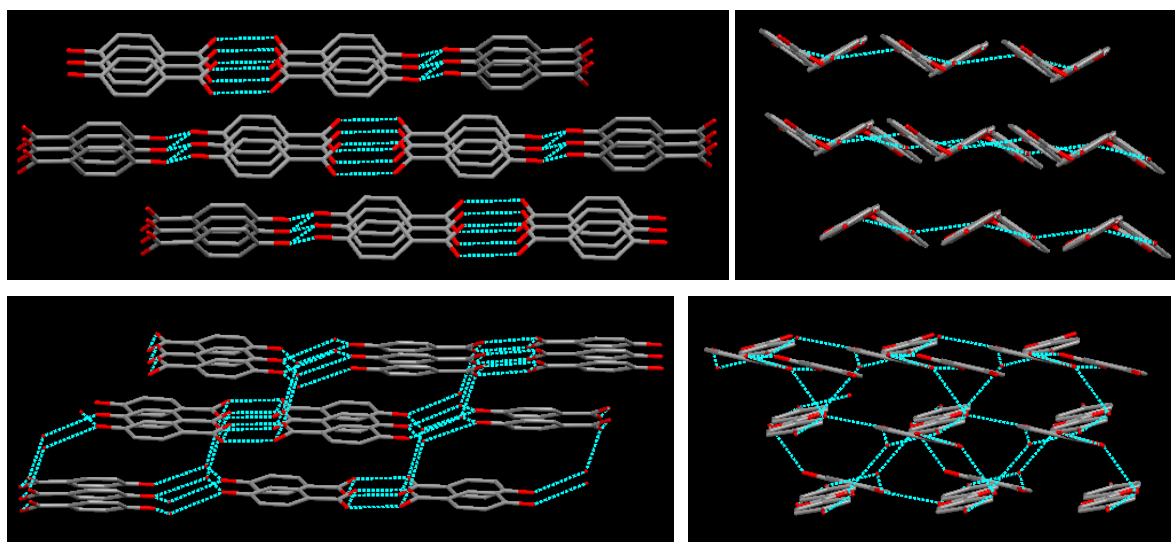

**Figure S10** Crystallographic interactions in the *p*-Hydroxybenzoic acid: anhydrous (top) and hydrate (bottom).

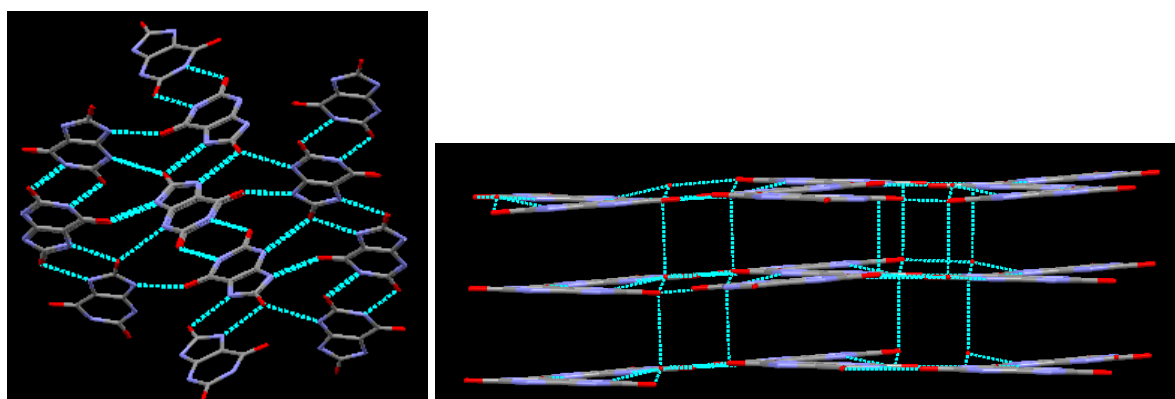

**Figure S11** Crystallographic interactions in the Uric acid: anhydrous (left) and hydrate (right).

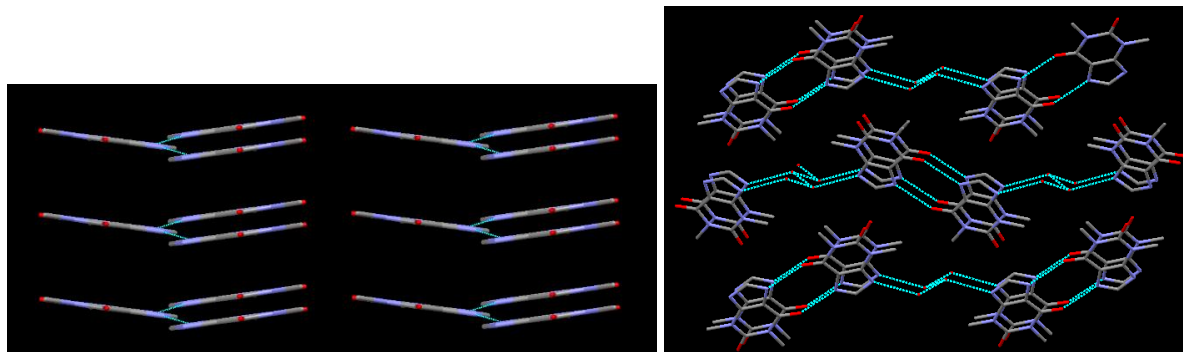

**Figure S12** Crystal packing and interactions in Theophylline: anhydrous (left) and hydrate (right).

## S2. References:

1. H. A. Reece and D. C. Levendis, Polymorphs of gabapentin. *Acta Crystallogr. Sect. C* 2008, 64, o105-o108.
2. Y. Wang, S. Du, S. Wu, L. Li, D. Zhang, B. Yu, L. Zhou, H. K. Bekele and J. Gong, Thermodynamic and molecular investigation into the solubility, stability and self-assembly of gabapentin anhydrate and hydrate. *The Journal of Chemical Thermodynamics* 2017, 113, 132-143.
